# Supplementary material
Source: Springer Nature journal article supplement (https://www.springermedizin.de/resource/supplementary/12967_2008_324_MOESM3_ESM.pdf/9576222)

**A****TZM**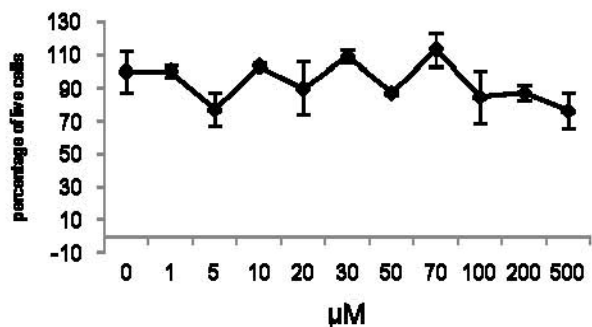**B****LND**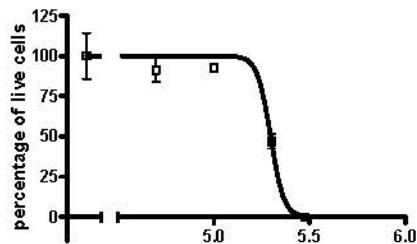**CD437**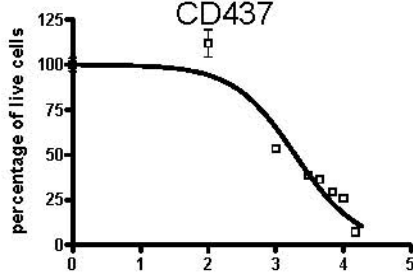**BA**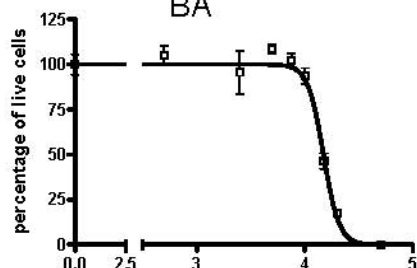**CCCp**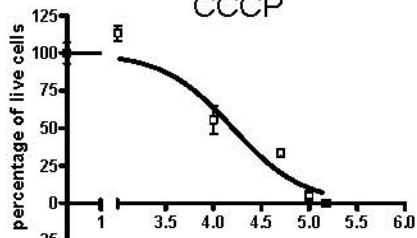**CsA**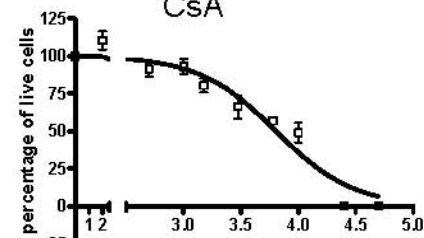

Supplement: MOESM3 [file 9576222]
